# Supplementary material for: Seasonal carbon fluxes from vegetation and soil in a Mediterranean non-tidal salt marsh
Source: Copernicus journal article supplement (doi:10.5194/bg-22-289-2025), 2025-01-14
Supplement: Supplementary file 1 [file bg-22-289-2025-supplement.pdf]

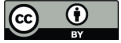

*Supplement of*

## **Seasonal carbon fluxes from vegetation and soil in a Mediterranean non-tidal salt marsh**

**Lorena Carrasco-Barea et al.**

*Correspondence to:* Lorena Carrasco-Barea ([lorena.carrasco.barea@gmail.com](mailto:lorena.carrasco.barea@gmail.com))

The copyright of individual parts of the supplement might differ from the article licence.

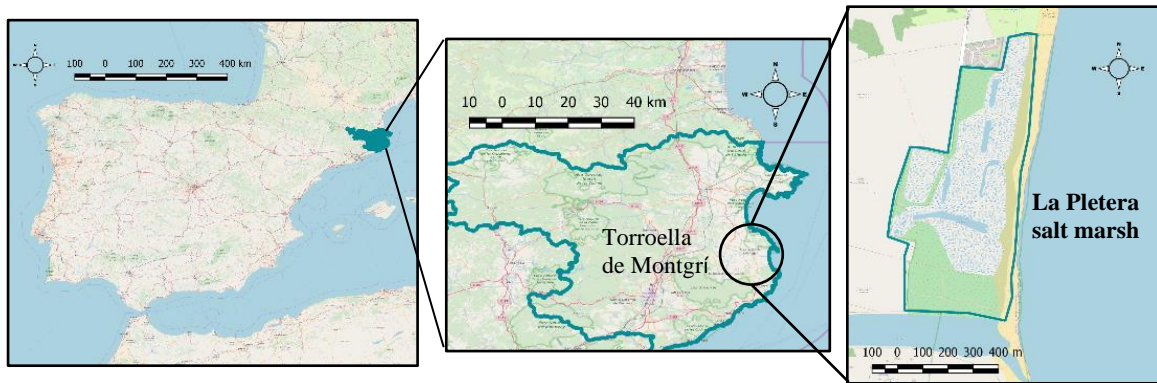

**Figure S1.** Geographical location of La Pletera salt marsh. On the left, Girona province (NE of the Iberian Peninsula); at the center, Torroella de Montgrí municipality; on the right, La Pletera salt marsh (from © OpenStreetMap contributors 2018. Distributed under the Open Data Commons Open Database License (ODbL) v1.0.).

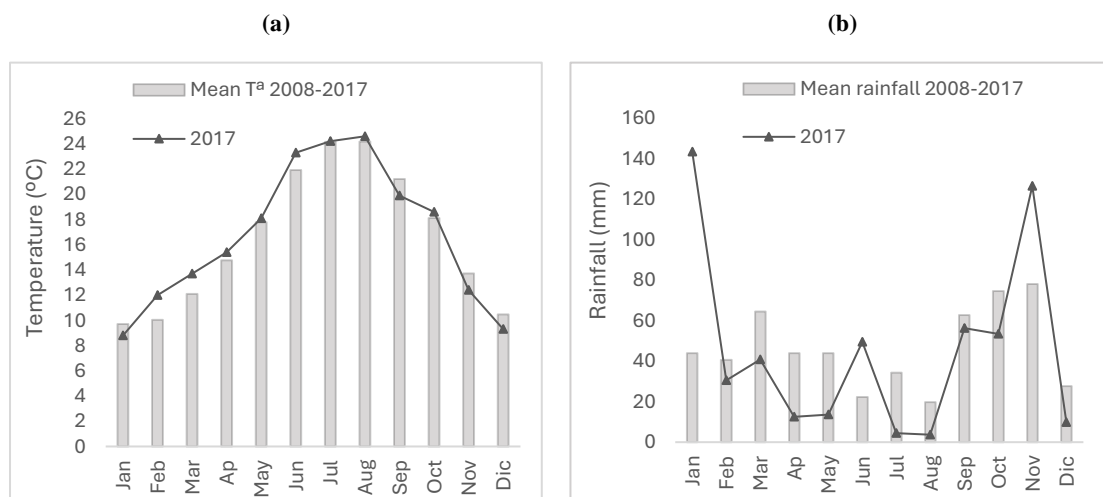

**Figure S2.** Monthly mean daily temperature (a) and monthly total rainfall (b) for the year in which sampling was performed (2017) and 10-year average (2008–2017) for both variables (a, b). Climate data was obtained from l'Estartit meteorological station located at 2.5 km from La Pletera salt marsh.

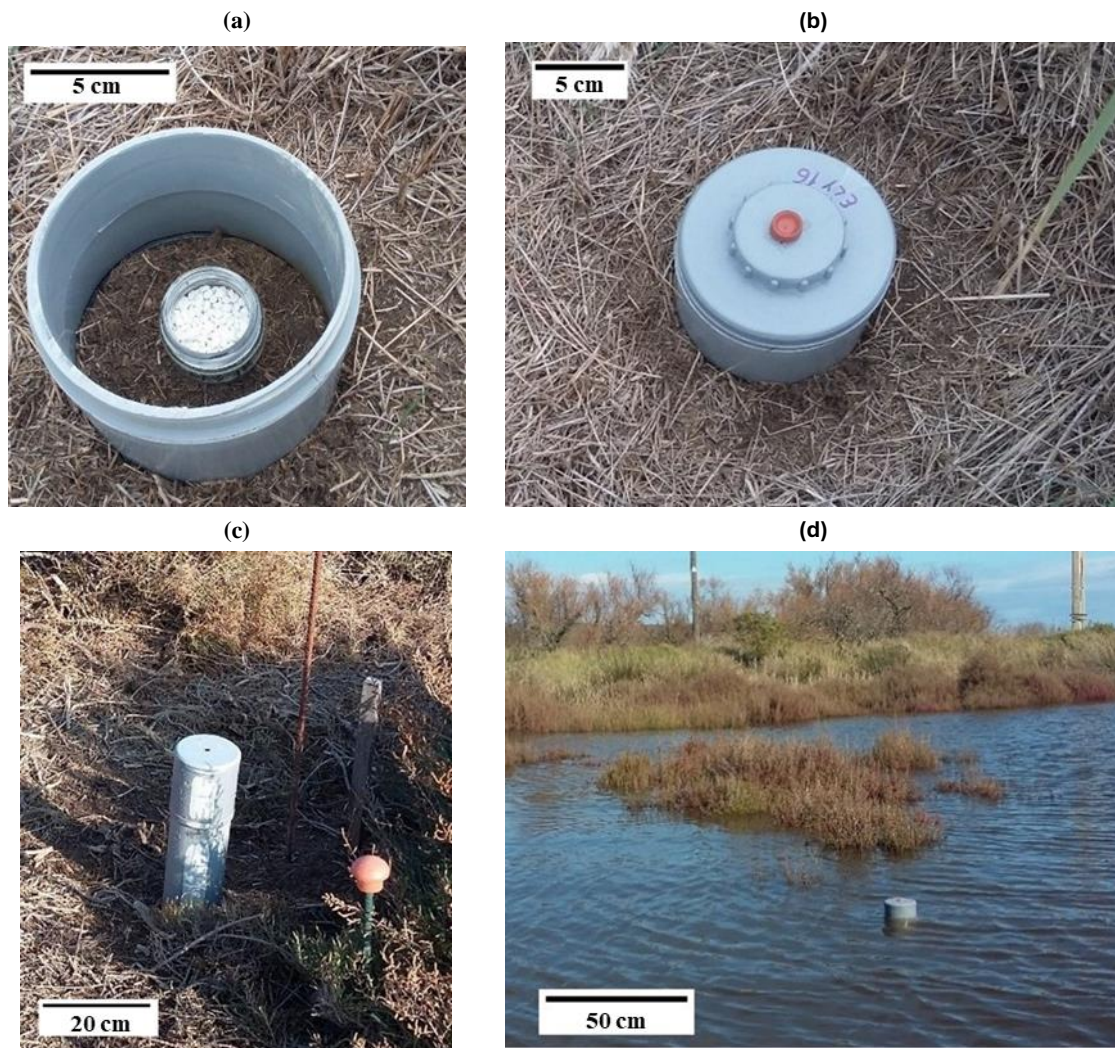

**Figure S3.** Opaque chambers used to take the measurements of net soil CO<sub>2</sub> and CH<sub>4</sub> fluxes under non-flooded (a, b) and flooded (c, d) conditions. When soil was not flooded, soda lime was placed inside the chamber (a) and then it was hermetically closed (b).

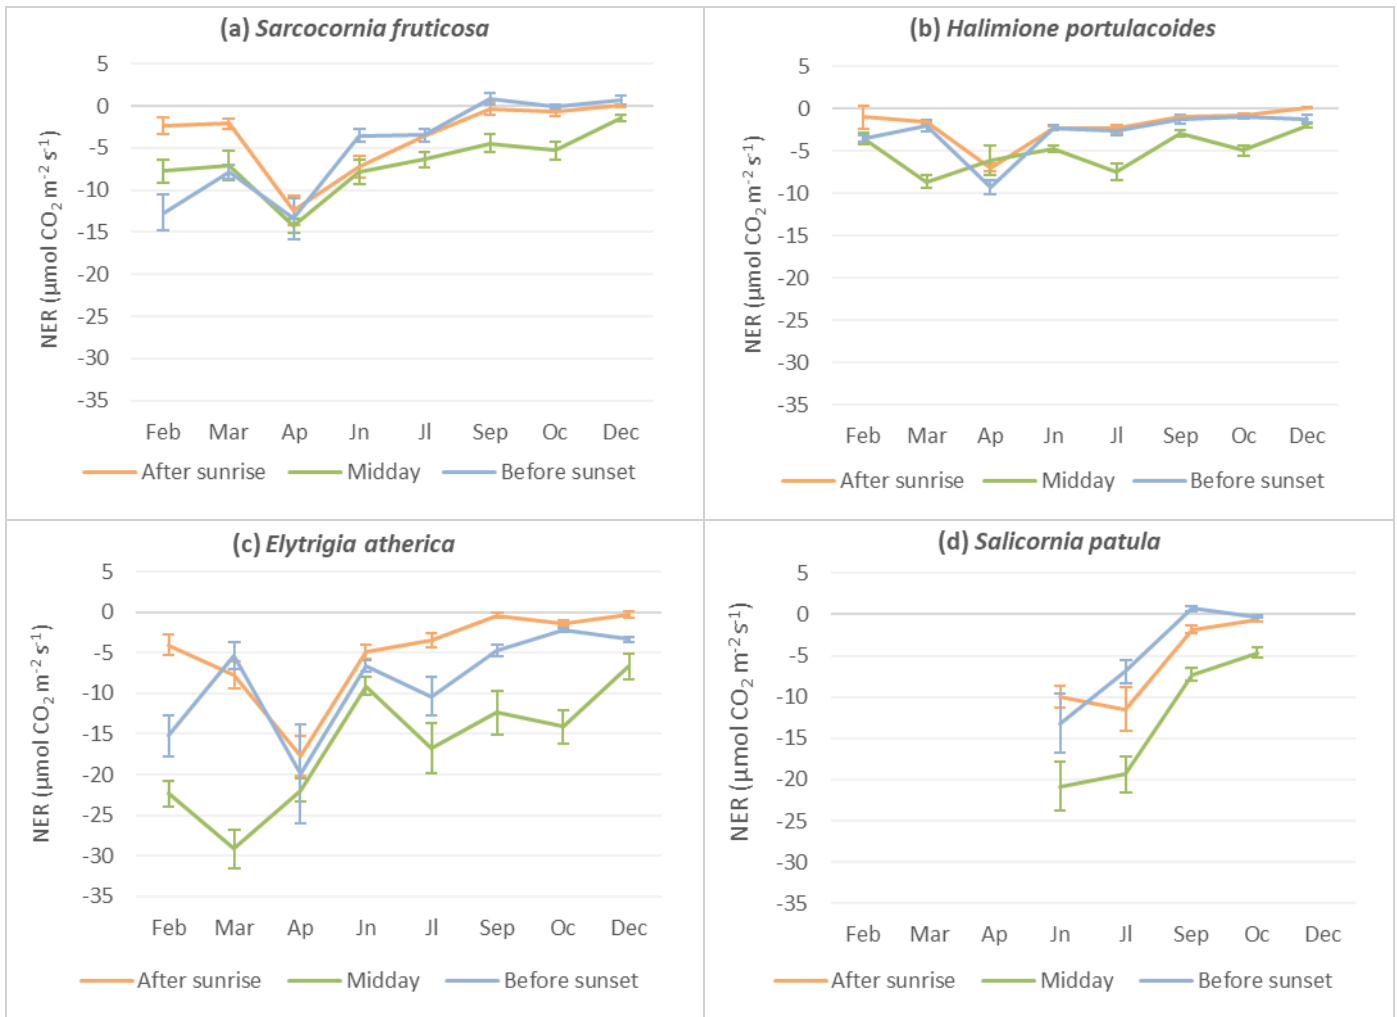

**Figure S4.** Instantaneous net CO<sub>2</sub> exchange rates (NER) at three daily periods (after sunrise, at midday and before sunset) for the green tissues of *S. fruticosa* (a), *H. portulacoides* (b), *E. atherica* (c) and *S. patula* (d). Negative values indicate net photosynthetic activity, while positive values indicate net respiration. Bars represent standard errors (n = 4 after sunrise, before sunset and at night, while n = 6 at midday).

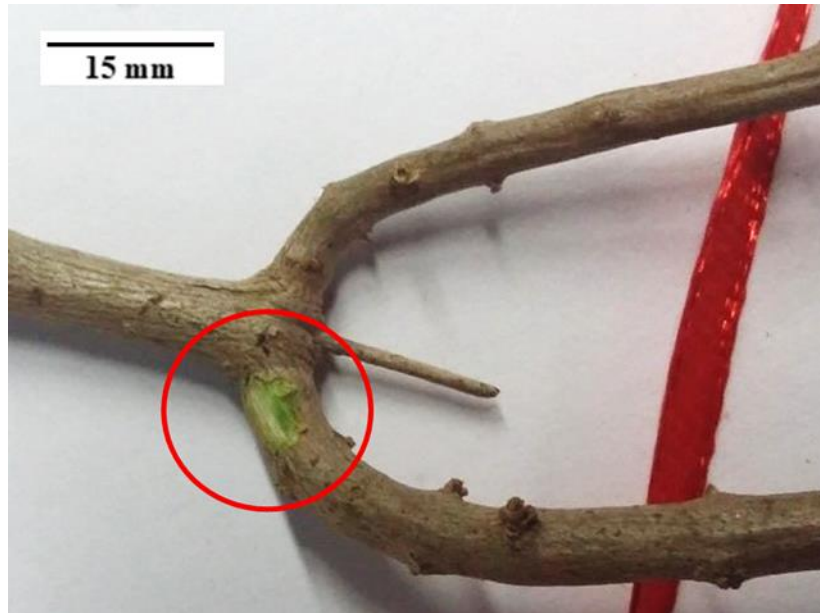

**Figure S5.** Thin woody stems of *S. fruticosa* where the green tissue under the bark can be observed.

**Table S1.** Summary of the samplings performed to determine CO<sub>2</sub> fluxes from green and thin woody ( $\varnothing \leq 3\text{mm}$ ) plant tissues throughout one year (2017). The frequency of samplings per season and the number of plants measured per species (n) are shown for the different times of the day when measurements were taken.

| Time of the day | n | Frequency of samplings                                                                                                                                      |                                                                                                     |
|-----------------|---|-------------------------------------------------------------------------------------------------------------------------------------------------------------|-----------------------------------------------------------------------------------------------------|
|                 |   | Green tissues                                                                                                                                               | Thin woody tissues                                                                                  |
| After sunrise   | 4 | Every month and a half approximately (twice/season):<br>9 February, 10-16 March, 19-20 April, 8-13 June, 10-12 July, 4-11 September, 23 October, 6 December | Every three months approximately (once/season):<br>10 March, 15-16 May, 24-28 August, 7-15 November |
| Midday          | 6 |                                                                                                                                                             |                                                                                                     |
| Before sunset   | 4 |                                                                                                                                                             |                                                                                                     |
| Night           | 4 | Every three months approximately (once/season):<br>10 February, 13 June, 28 August, 15 November                                                             |                                                                                                     |

**Table S2.** Summary of the samplings conducted to determine soil CO<sub>2</sub> fluxes throughout 2017. It includes the number of flooded and non-flooded plots in every sampling day and the method used in each flood state.

| Habitat           | Flood state | Method             | Winter |     | Spring |     | Summer |     | Autumn |     |
|-------------------|-------------|--------------------|--------|-----|--------|-----|--------|-----|--------|-----|
|                   |             |                    | Feb    | Mar | Apr    | Jun | Jul    | Sep | Oct    | Dec |
| Halophilous scrub | Non-flooded | Soda-lime          |        | 5   | 5      | 5   | 5      | 5   | 5      | 5   |
|                   | Flooded     | Gas chromatography | 5      |     |        |     |        |     |        |     |
| Salt meadow       | Non-flooded | Soda-lime          |        | 5   | 5      | 5   | 5      | 5   | 5      | 5   |
|                   | Flooded     | Gas chromatography | 5      |     |        |     |        |     |        |     |
| Glasswort sward   | Non-flooded | Soda-lime          |        | 2   | 5      | 5   | 5      | 5   | 5      | 2   |
|                   | Flooded     | Gas chromatography | 5      | 3   |        |     |        |     |        | 3   |

**Table S3.** Mean  $\pm$  SE of soil organic carbon (SOC), total nitrogen (TN) and bulk density (BD) obtained in a parallel study performed by Carrasco-Barea et al. (2023) for the same plots used in the present study.

| Habitat           | SOC (%)         | TN (%)            | BD (g cm <sup>-3</sup> ) |
|-------------------|-----------------|-------------------|--------------------------|
| Halophilous scrub | 3.24 $\pm$ 0.83 | 0.143 $\pm$ 0.038 | 1.09 $\pm$ 0.09          |
| Salt meadow       | 2.07 $\pm$ 0.36 | 0.097 $\pm$ 0.013 | 1.03 $\pm$ 0.04          |
| Glasswort sward   | 0.55 $\pm$ 0.05 | 0.034 $\pm$ 0.006 | 1.17 $\pm$ 0.02          |

**Table S4.** Maximum, minimum and mean ( $\pm$  SE; n=8) instantaneous net CO<sub>2</sub> exchange rates (NER) ( $\mu\text{mol CO}_2 \text{ m}^{-2} \text{ s}^{-1}$ ) for green and woody tissues of the four studied species after sunrise, at midday, before sunset and at night. Negative values indicate net photosynthetic activity, while positive values indicate net respiration.

|                          |               | <i>S. fruticosa</i> |                  | <i>E. atherica</i> | <i>H. portulacoides</i> |                  | <i>S. patula</i>  |
|--------------------------|---------------|---------------------|------------------|--------------------|-------------------------|------------------|-------------------|
|                          |               | green               | woody            | green              | green                   | woody            | green             |
| <b>NER after sunrise</b> | Max           | 0.06                | 2.45             | -0.34              | 0.08                    | 1.56             | -0.59             |
|                          | Min           | -12.42              | -3.05            | -17.65             | -6.96                   | -1.93            | -11.47            |
|                          | Mean $\pm$ SE | -3.57 $\pm$ 1.51    | -0.24 $\pm$ 1.12 | -4.98 $\pm$ 2.01   | -1.96 $\pm$ 0.77        | -0.45 $\pm$ 0.77 | -5.99 $\pm$ 2.78  |
| <b>NER midday</b>        | Max           | -1.42               | 1.73             | -6.64              | -2.02                   | 1.15             | -4.61             |
|                          | Min           | -14.31              | -7.24            | -29.11             | -8.60                   | -3.46            | -20.80            |
|                          | Mean $\pm$ SE | -6.82 $\pm$ 1.30    | -2.36 $\pm$ 1.92 | -16.54 $\pm$ 2.66  | -5.03 $\pm$ 0.80        | -1.35 $\pm$ 0.98 | -13.01 $\pm$ 4.14 |
| <b>NER before sunset</b> | Max           | 0.85                | 3.26             | -2.25              | -0.98                   | 1.81             | 0.72              |
|                          | Min           | -13.39              | -6.35            | -19.90             | -9.30                   | -9.57            | -13.17            |
|                          | Mean $\pm$ SE | -4.93 $\pm$ 2.04    | -2.39 $\pm$ 2.34 | -8.48 $\pm$ 2.20   | -2.90 $\pm$ 0.96        | -4.56 $\pm$ 2.88 | -4.91 $\pm$ 3.24  |
| <b>NER night</b>         | Max           | 1.69                | 2.00             | 1.67               | 0.63                    | 1.66             | 0.93              |
|                          | Min           | 0.28                | 0.25             | 0.13               | 0.25                    | 0.39             | 0.46              |
|                          | Mean $\pm$ SE | 1.06 $\pm$ 0.31     | 1.04 $\pm$ 0.43  | 0.99 $\pm$ 0.40    | 0.49 $\pm$ 0.08         | 1.12 $\pm$ 0.31  | 0.70 $\pm$ 0.16   |

**Table S5.** Maximum, minimum and mean ( $\pm$  SE; n=8) stomatal conductance ( $g_s$ ) and intrinsic water-use efficiency (iWUE) for the green tissues of the four studied species at midday.

|                                                                                       |               | <i>S. fruticosa</i> | <i>E. atherica</i> | <i>H. portulacoides</i> | <i>S. patula</i> |
|---------------------------------------------------------------------------------------|---------------|---------------------|--------------------|-------------------------|------------------|
| <b><math>G_s</math> midday</b><br>( $\text{mmol H}_2\text{O m}^{-2} \text{ s}^{-1}$ ) | Max           | 107.1               | 381.3              | 97.0                    | 73.4             |
|                                                                                       | Min           | 15.1                | 25.1               | 9.0                     | 42.4             |
|                                                                                       | Mean $\pm$ SE | 41.0 $\pm$ 1.6      | 163.6 $\pm$ 15.5   | 33.7 $\pm$ 2.0          | 56.9 $\pm$ 2.9   |
| <b>iWUE midday</b><br>( $\mu\text{mol CO}_2 \text{ mol}^{-1} \text{ H}_2\text{O}$ )   | Max           | 767.5               | 842.8              | 623.9                   | 331.0            |
|                                                                                       | Min           | 26.8                | 28.4               | 93.4                    | 119.2            |
|                                                                                       | Mean $\pm$ SE | 271.5 $\pm$ 95.6    | 319.3 $\pm$ 103.4  | 292.5 $\pm$ 68.1        | 232.1 $\pm$ 53.8 |

**Table S6.** Maximum, minimum and mean ( $\pm$  SE; n=7) soil respiration (SR), soil methane flux (SMF) and mineralization quotient (Qmin) from non-flooded soils.

|                                                                     |               | <b>Halophilous scrub</b> | <b>Salt meadow</b> | <b>Glasswort sward</b> |
|---------------------------------------------------------------------|---------------|--------------------------|--------------------|------------------------|
| <b>SR</b><br>(g CO <sub>2</sub> m <sup>-2</sup> d <sup>-1</sup> )   | Max           | 19.4                     | 17.2               | 13.2                   |
|                                                                     | Min           | 6.1                      | 4.5                | 4.0                    |
|                                                                     | Mean $\pm$ SE | 12.3 $\pm$ 1.9           | 10.7 $\pm$ 1.7     | 8.4 $\pm$ 1.3          |
| <b>SMF</b><br>(mg CH <sub>4</sub> m <sup>-2</sup> d <sup>-1</sup> ) | Max           | 270.5                    | 161.1              | 109.6                  |
|                                                                     | Min           | -15.6                    | -7.5               | -11.3                  |
|                                                                     | Mean $\pm$ SE | 36.5 $\pm$ 39.3          | 26.7 $\pm$ 22.7    | 22.0 $\pm$ 15.7        |
| <b>Qmin</b>                                                         | Max           | 0.0025                   | 0.0024             | 0.0044                 |
|                                                                     | Min           | 0.0007                   | 0.0006             | 0.0016                 |
|                                                                     | Mean $\pm$ SE | 0.00016 $\pm$ 0.0002     | 0.014 $\pm$ 0.0002 | 0.0030 $\pm$ 0.0004    |
